# Supplementary material
Source: PubMed Central journal article supplement (PMC8315344)
Supplement: mmc1.pdf [file mmc1.pdf]

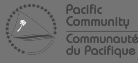

**Suva Regional Office**  
Private Mail Bag  
Suva, Fiji  
Email: [spc@spc.int](mailto:spc@spc.int)  
Phone: +679 337 0733  
Fax: +679 337 0021

**SPC Headquarters**  
25 Princesville Road, Larnage  
PF 05 98948 Noumea Cedex  
New Caledonia  
Email: [spc@spc.int](mailto:spc@spc.int)  
Phone: +687 26 20 00  
Fax: +687 26 36 19

## Pacific Regional Emergency Care: Facility (Hospital-based care)

### Welcome to the Pacific Regional Emergency Care - Facility Survey

**You are invited to participate in this on-line survey about emergency care (EC) in the Pacific region.**

**Your participation is voluntary. We will not be collecting any of your personal information or any information that can identify you. Completing the survey will take around 15 minutes of your time.**

**The aim of this survey is to hear your opinions on the current status of EC in the country where you work, and then what you think are the most important priorities and standards for Pacific regional EC development.**

**The Pacific Community (SPC) have requested this project and contracted Dr Georgina Phillips to perform the work of creating the survey and collecting all of the results from your responses.**

**The results of the survey will be summarised and then presented to all of the Pacific Island Country representatives attending the Regional Development workshop on Wednesday 5th December 2018 at the DevelopingEM conference in Fiji. After this meeting and receiving everyone's feedback, we aim to reach a consensus on the priorities and standards for EC development across the Pacific region.**

**The final outcomes of this work will be;**

- **A comprehensive report for SPC that can be used to advocate for and guide future Pacific regional EC developments, and will also be delivered to Pacific Island Country Ministries of Health**
- **A research paper written by Dr Phillips in collaboration with SPC representatives and Pacific Island clinicians and published in a peer-review journal. This research paper will contribute towards the PhD studies of Dr Phillips at Monash University in Australia. Monash University have given ethics approval for this research.**

**If you would like to receive feedback about the survey results and participate in ongoing consensus work, you are free to provide your contact details at the end of the survey. You can also choose to be acknowledged by name in both of these output documents.**

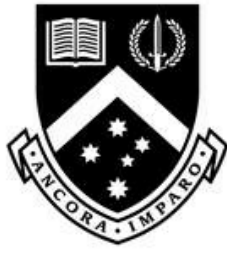

**MONASH**  
University



Suva Regional Office  
 Private Mail Bag  
 Suva, Fiji  
 Email: spc@spc.int  
 Phone: +679 337 0733  
 Fax: +679 337 0021

SPC Headquarters  
 25 Promenade Roger Larouque  
 BP 05, 98848 Noumea Cedex  
 New Caledonia  
 Email: spc@spc.int  
 Phone: +687 26 20 00  
 Fax: +687 26 38 19

## Pacific Regional Emergency Care: Facility (Hospital-based care)

### You and where you work

1. What country do you currently work in?



2. What type of facility do you work in?

- |                                                          |                                             |
|----------------------------------------------------------|---------------------------------------------|
| <input type="radio"/> National referral hospital         | <input type="radio"/> Small health facility |
| <input type="radio"/> Provincial / Divisional hospital   | <input type="radio"/> Health Centre         |
| <input type="radio"/> District / Sub-divisional hospital | <input type="radio"/> Nursing station       |
| <input type="radio"/> Other (please specify)             |                                             |

3. What is your main role?

- |                                              |                                                |
|----------------------------------------------|------------------------------------------------|
| <input type="radio"/> Doctor                 | <input type="radio"/> Medical superintendent   |
| <input type="radio"/> Nurse                  | <input type="radio"/> Director of nursing      |
| <input type="radio"/> Hospital administrator | <input type="radio"/> Ministry of Health staff |
| <input type="radio"/> Other (please specify) |                                                |

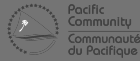

Suva Regional Office  
Private Mail Bag  
Suva, Fiji  
Email: srsp@pacint  
Phone: +679 337 0733  
Fax: +679 337 0021

SPC Headquarters  
25 Princesville Road, Larnage  
PO Box 98848 Nuku'alofa  
New Caledonia  
Email: spc@pacint  
Phone: +687 26 20 00  
Fax: +687 26 36 19

## Pacific Regional Emergency Care: Facility (Hospital-based care)

### SECTION A: Current Situation Snapshot

For the following questions please indicate by selecting the option which best describes the current situation of FACILITY (HOSPITAL) -BASED emergency care (EC) in the country where you work:

4. Is there a system where patients are registered and seen in order of clinical urgency (**triage**) ?

- No such system exists
- We try to use a recognised triage system in the National Referral Hospital, but it is inconsistent and there is no specific training. There is no system for provincial and rural areas
- We consistently use a recognised triage system in the National Referral Hospital along with routine patient registration, and we have special triage training. This system is not used in provincial or rural areas
- We consistently use a recognised triage system in the National Referral Hospital along with routine patient registration, and we have special triage training. This system is also used in at least one other provincial / district / divisional level hospital
- We reliably and consistently use a recognised triage system, with patient registration across all hospitals in our country.

5. What is your **current triage system**?

- Australasian Triage Scale (5 categories) without modifications
- Australasian Triage Scale (5 categories) with local modifications
- South African Triage Scale (4 categories)
- Solomon Islands Triage Scale (3 categories)
- No official system / patients seen in time order of arrival
- Other (please describe, including number of categories)

**6. Are there clinical staff with Emergency Care (EC) training and skills to provide care?**

- Staff in the emergency department (ED) do not have specific EC skills training, and staff are expected to rotate around all areas of the hospital
- Some nurses and doctors at our National Referral Hospital ED have had short course training (BLS, ACLS, PTC, SIREN etc.) Most staff in other hospitals have not had any specific training in EC. Staff rotate around all areas of the hospital.
- Most nurses and doctors in our National Referral Hospital have had short course training (BLS, ACLS, PTC, SIREN etc.) in EC . Some nurses and doctors in other hospitals have had short course training in EC. Senior ED nurses do not rotate out of the ED to other areas of the hospital
- At least one doctor has a postgraduate qualification in EC (Diploma / Masters) and permanent nurses have some EC training (short course, short-term ED attachments, Diploma) in our National Referral Hospital. Some other hospitals have nurses and junior doctors who have had short course training (BLS, ACLS, PTC, SIREN etc.) in EC
- There are permanent doctors and nurses with EC qualifications (Certificate / Diploma / Masters) in our National Referral Hospital, and most doctors and nurses in other hospitals have had at least short course training (BLS, ACLS, PTC, SIREN etc.) and may have post-graduate qualifications in EC

**7. Is there a purpose built Emergency Department (ED) with rooms for resuscitation, assessment, treatment, monitoring and observation?**

- There are no purpose built EDs in any hospital in the country, and no special area for patient resuscitation
- The National Referral Hospital has a purpose built ED with a special area for resuscitation, but there are limited and/or poorly designed areas for further assessment, treatment and observation. Other hospitals around the country do not have purpose built EDs and do not have special areas for patient resuscitation.
- The National Referral Hospital has a purpose built ED with a special area for resuscitation, but there are limited and/or poorly designed areas for further assessment, treatment and observation. At least one other provincial /district / divisional hospital has a purpose built ED with a special area for patient resuscitation and further emergency care.
- The National Referral Hospital has a purpose built ED with a good area for resuscitation and adequate areas for assessment, treatment, monitoring and observation. There are EDs in some provincial / district / divisional hospitals with special areas for patient resuscitation and limited areas for further emergency care.
- The National Referral Hospital has a purpose built ED with a good area for resuscitation and adequate areas for assessment, treatment, monitoring and observation. There are EDs in most provincial / district / divisional hospitals with a special area for patient resuscitation and adequate area for further emergency care. Smaller hospitals have a basic ED or area designated for emergency patients

**8. Is there functioning equipment for adult and paediatric resuscitation and EC provision?**

- There is no dedicated functioning equipment for basic resuscitation and EC of adults and children at any level of hospital in my country.
- There is some old / incomplete / poorly functioning resuscitation equipment for basic Airway, Breathing and Circulation care in our National Referral Hospital. There is no dedicated or functioning equipment at the provincial / district / divisional level hospital
- There is complete and functioning equipment for Airway (including intubation, Oxygen saturation), Breathing (bag-valve-mask ventilation) and Circulation (IV fluids, vasoactive drugs) at our National Referral Hospital. We have some old / incomplete / poorly functioning resuscitation equipment at provincial / district / divisional level hospitals.
- There is complete and functioning equipment for Airway (including intubation, Oxygen saturation), Breathing (bag-valve-mask ventilation) and Circulation (IV fluids, vasoactive drugs). There are ECG machines, cardiac monitoring, advanced trauma care and mechanical ventilation at our National Referral Hospital. At least one provincial / district / divisional level hospital has complete and functioning basic ABC equipment.
- There is complete and functioning equipment for Airway (including intubation, Oxygen saturation), Breathing (bag-valve-mask ventilation) and Circulation (IV fluids, vasoactive drugs). There are ECG machines, cardiac monitoring, advanced trauma care and mechanical ventilation at our National Referral Hospital. Most provincial / district / divisional hospitals have complete and functioning resuscitation ABC equipment, ECG machines and cardiac monitoring.

**9. Are there local clinical guidelines and protocols for EC, or international guidelines adapted for local practice?**

- There are no clinical guidelines or protocols for EC used in my country
- We use a standardised resuscitation guideline for cardiac arrest in our National Referral Hospital, but no other clinical guidelines. Guidelines are not used in provincial / district / divisional level hospitals
- We use a standardised resuscitation guideline for cardiac arrest, and we use internationally recognised guidelines, such as WHO guidelines for some common diseases at the National Referral Hospital – but they are not used consistently. Guidelines are not used in provincial / district / divisional level hospitals
- We use a standardised resuscitation guideline for cardiac arrest, and we use a mixture of internationally recognised guidelines, such as WHO guidelines and local EC treatment guidelines for common presentations at the National Referral Hospital. There is some inconsistent use of resuscitation and other guidelines at provincial / district / divisional level hospitals
- We consistently use standardised resuscitation, internationally recognised guidelines, and local EC treatment guidelines for common presentations. These guidelines are used both at the National Referral Hospital and at most provincial / district / divisional level hospitals

10. Is there any system for **data collection** on patients that present and receive treatment in an ED?

- We have no system of data collection in any ED in our country
- The nurses use a paper-based log-book, and record all patients who present to the ED in our National Referral Hospital. Information includes basic demographic data and why they came to the ED. This system is not used consistently in provincial / district / divisional level hospitals and there are many gaps in the data
- The nurses use a log-book for recording all patient presentations, and then collect all ED patient notes. The ED diagnosis and patient disposition is recorded in the log-book for all patients that get admitted. The ED notes are not linked to the past medical record notes of the patient. This system is used at the National Referral Hospital and a similar system is used in provincial / district / divisional level hospitals
- We have clerical staff who record information on all patients who present to the ED; including their presenting complaint, treatment and time in the ED, their ED diagnosis and final disposition. This is a paper or computer based system for data collection and is used in the National Referral Hospital only. Nurses use a log-book system at the provincial / district / divisional hospital level
- We have clerical staff who record information on all patients who present to the ED; including their presenting complaint, treatment and time in the ED, their ED diagnosis and final disposition. This information is collected directly into a computer system and is applied consistently across most hospital EDs in the country.

11. Is **access block** or exit block (**overcrowding in the ED** due to inability to move admitted patients to the ward) a problem where you work?

- We have no overcrowding in any ED in our country and all admitted patients move quickly to the wards.
- We sometimes have admitted patients stay for up to 12 hours in our ED waiting for ward transfer. This only happens at the National Referral Hospital and does not happen at the provincial / district / divisional level hospitals.
- We regularly have admitted patients stay for up to 12-24 hrs in our ED waiting for ward transfer. The ED is often overcrowded and we have to see patients in the corridor. This only happens at the National Referral Hospital and does not happen at the provincial / district / divisional level hospitals.
- We regularly have admitted patients stay for 12-24 hours or longer in our ED waiting for ward transfer. Our ED is usually overcrowded and we regularly see patients in corridors and other unsafe areas. This happens at the National Referral Hospital and sometimes happens at the provincial / district / divisional level hospitals.
- We regularly have admitted patients stay for 24 hours or longer and sometimes have patients stay for days in our ED waiting for ward transfer. Our ED is usually overcrowded and we regularly see patients in corridors and other unsafe areas. This happens at the National Referral Hospital and many other hospitals in the country.

12. Is there a local or national **plan for a surge response for EC** (where your facility can increase capacity to treat a large number of patients) during a **disaster, mass casualty** or **disease outbreak** situation?

- We have no local or national plan for a surge response in the event of a disaster
- There is a National Referral Hospital disaster plan but EC staff have not been involved in creating the plan, or received any information or training in its use.
- There is a National Referral Hospital disaster plan with roles and responsibilities for the ED staff but there has not been any training or surge response drills involving EC staff.
- There is a National Referral Hospital disaster plan that involves the ED. Senior EC doctors and nurses have clear roles and responsibilities, and are involved in training and surge response drills.
- There are individual hospital disaster plans at the National Referral Hospital and most other hospitals, which link to regional and national plans. Senior EC doctors and nurses are involved in training and surge response drills across the country.

**13. Is there any national plan for EC development, and is EC identified as a priority area in your country?**

- Emergency Care is not considered an important issue and is not a priority for the Ministry of Health in my country
- Our Ministry of Health acknowledges that EC needs to improve, but has not prioritised any EC developments in planning or budgeting
- EC is one of the identified priority areas for improvement, but as yet there has been no work to plan the next steps for EC development
- The Ministry of Health has identified EC as a priority area at the National Referral Hospital and has taken steps through planning and budgeting to make some improvements at this level only
- The Ministry of Health has identified EC as a priority area for the whole country and is making a development plan for EC improvement across all levels of pre-hospital and facility-based care.





Suva Regional Office  
Private Mail Bag  
Suva, Fiji  
Email: spc@pacint.net  
Phone: +679 337 0733  
Fax: +679 337 0021

SPC Headquarters  
25 Promenade Roger Laroque  
BP 05, 98848 Noumea Cedex  
New Caledonia  
Email: spc@pacint.net  
Phone: +687 26 20 00  
Fax: +687 26 26 19

## Pacific Regional Emergency Care: Facility (Hospital-based care)

### SECTION B: Regional Priorities

The following questions relate to the “building blocks” that make up a facility-based emergency care (EC) system.

These building blocks are based on the WHO EC Systems Framework and are considered under 5 categories (human resources & training, infrastructure & equipment, data, processes, leadership & governance.)

|                                          | Human Resources & Training                                                                                                     | Infrastructure and Equipment                                                                                                                       | Data (information and research)                                                                                      | Processes                                                                                                  | Leadership & Governance                                                                                                    |
|------------------------------------------|--------------------------------------------------------------------------------------------------------------------------------|----------------------------------------------------------------------------------------------------------------------------------------------------|----------------------------------------------------------------------------------------------------------------------|------------------------------------------------------------------------------------------------------------|----------------------------------------------------------------------------------------------------------------------------|
| Reception                                | Trained professional providers for registration, data collection and triage (clerical and nursing)                             | Area for patient triage and basic triage assessment kits                                                                                           | Information system for patient registration, chief complaint and patient tracking                                    | Standardised triage system and syndromic surveillance protocols                                            | Universal access to facility-based EC at no charge. Recognition of EC as a distinct and necessary component of health care |
| ED / Emergency Unit care and disposition | Trained professional providers for resuscitation, assessment, treatment and monitoring (doctors, nurses, mid-level clinicians) | Physical area designated as an ED with space for resuscitation, assessment, treatment, monitoring and observation (according to level of facility) | Information system for recording ED processes, times to care, quality metrics, ED diagnosis and disposition outcomes | Clinical care, resuscitation and team-based care guidelines and protocols                                  | Clinical leadership and clinical governance providing supervision and oversight. Accountability for quality and safety     |
|                                          | Standardised training options (short course and certified/degree) for providers working in EC Facilities                       | Standardised equipment for resuscitation (ABC), evaluation, treatment and monitoring for adults and children.                                      |                                                                                                                      | ED observation ward admission, referral, and transfer guidelines and patient flow / access block protocols | Employment structures recognising and credentialing training; providing career pathways in EC                              |
| Overall system function                  | Dedicated 24 hr facility-based staff with                                                                                      |                                                                                                                                                    | Appropriate and feasible quality and                                                                                 | Incident reporting, audit,                                                                                 | Laws governing patient – provider relationship                                                                             |

|  |                                                |                                                                                                                                       |                                                 |                                                                   |                                                                                          |
|--|------------------------------------------------|---------------------------------------------------------------------------------------------------------------------------------------|-------------------------------------------------|-------------------------------------------------------------------|------------------------------------------------------------------------------------------|
|  | certification, recognition and career pathways |                                                                                                                                       | safety metrics developed for Pacific Is context | morbidity and mortality review. Systems for reviewing performance | (privacy, negligence, malpractice, mandatory reporting)                                  |
|  |                                                | Basic amenity (hand hygiene, toilets, air quality, etc) for infection control, patient and staff safety and communications technology |                                                 |                                                                   | Standard Operating Procedures for multi-agency collaboration in disasters / surge events |

Considering the **PACIFIC REGION** as a whole:

For each building block, please rate the **URGENCY** of Facility-based regional development; whether it should be an immediate priority, achieved in 5 years, or is a long-term goal.

14. Under the category of **Human Resources and Training**, please rate the urgency of each building block:

|                                                                                                                                | Immediate priority    | Should achieve in 5 years | Long term goal        |
|--------------------------------------------------------------------------------------------------------------------------------|-----------------------|---------------------------|-----------------------|
| Trained professional providers for registration, data collection and triage (clerical and nursing)                             | <input type="radio"/> | <input type="radio"/>     | <input type="radio"/> |
| Trained professional providers for resuscitation, assessment, treatment and monitoring (doctors, nurses, mid-level clinicians) | <input type="radio"/> | <input type="radio"/>     | <input type="radio"/> |
| Standardised training options (short course and certified/degree) for providers working in EC Facilities                       | <input type="radio"/> | <input type="radio"/>     | <input type="radio"/> |
| Dedicated 24 hr facility-based staff with certification, recognition and career pathways                                       | <input type="radio"/> | <input type="radio"/>     | <input type="radio"/> |

15. Under the category of **Infrastructure and Equipment**, please rate the urgency of each building block:

|                                                                                                                                                    | Immediate priority    | Should achieve in 5 years | Long term goal        |
|----------------------------------------------------------------------------------------------------------------------------------------------------|-----------------------|---------------------------|-----------------------|
| Area for patient triage and basic triage assessment kits                                                                                           | <input type="radio"/> | <input type="radio"/>     | <input type="radio"/> |
| Physical area designated as an ED with space for resuscitation, assessment, treatment, monitoring and observation (according to level of facility) | <input type="radio"/> | <input type="radio"/>     | <input type="radio"/> |
| Standardised equipment for resuscitation (ABC), evaluation, treatment and monitoring for adults and children                                       | <input type="radio"/> | <input type="radio"/>     | <input type="radio"/> |
| Basic amenity (hand hygiene, toilets, air quality, etc.) for infection control, patient and staff safety and communications technology             | <input type="radio"/> | <input type="radio"/>     | <input type="radio"/> |

16. Under the category of **data (information and research)**, please rate the urgency of each building block:

|                                                                                                                      | Immediate priority    | Should achieve in 5 years | Long term goal        |
|----------------------------------------------------------------------------------------------------------------------|-----------------------|---------------------------|-----------------------|
| Information system for patient registration, chief complaint and patient tracking                                    | <input type="radio"/> | <input type="radio"/>     | <input type="radio"/> |
| Information system for recording ED processes, times to care, quality metrics, ED diagnosis and disposition outcomes | <input type="radio"/> | <input type="radio"/>     | <input type="radio"/> |
| Appropriate and feasible quality and safety metrics developed for Pacific Is context                                 | <input type="radio"/> | <input type="radio"/>     | <input type="radio"/> |

17. Under the category of **processes**, please rate the urgency of each building block:

|                                                                                                                    | Immediate priority    | Should achieve in 5 years | Long term goal        |
|--------------------------------------------------------------------------------------------------------------------|-----------------------|---------------------------|-----------------------|
| Standardised triage system and syndromic surveillance protocols                                                    | <input type="radio"/> | <input type="radio"/>     | <input type="radio"/> |
| Clinical care, resuscitation and team-based care guidelines and protocols                                          | <input type="radio"/> | <input type="radio"/>     | <input type="radio"/> |
| ED Observation Ward admission, patient referral, and transfer guidelines and patient flow / access block protocols | <input type="radio"/> | <input type="radio"/>     | <input type="radio"/> |
| Incident reporting, audit, morbidity and mortality review. Systems for reviewing performance                       | <input type="radio"/> | <input type="radio"/>     | <input type="radio"/> |

18. Under the category of **leadership and governance**, please rate the urgency of each building block:

|                                                                                                                            | Immediate priority    | Should achieve in 5 years | Long term goal        |
|----------------------------------------------------------------------------------------------------------------------------|-----------------------|---------------------------|-----------------------|
| Universal access to facility-based EC at no charge. Recognition of EC as a distinct and necessary component of health care | <input type="radio"/> | <input type="radio"/>     | <input type="radio"/> |
| Clinical leadership and clinical governance providing supervision and oversight. Accountability for quality and safety     | <input type="radio"/> | <input type="radio"/>     | <input type="radio"/> |
| Employment structures recognising and credentialing training; providing career pathways in EC                              | <input type="radio"/> | <input type="radio"/>     | <input type="radio"/> |
| Laws governing patient – provider relationship (privacy, negligence, malpractice, mandatory reporting)                     | <input type="radio"/> | <input type="radio"/>     | <input type="radio"/> |
| Standard Operating Procedures for multi-agency collaboration in disasters / surge events                                   | <input type="radio"/> | <input type="radio"/>     | <input type="radio"/> |

19. Are there any other important **regional Facility-based priorities** that are not in this list?

20. Considering the **PACIFIC REGION** as a whole, please rate the 5 main building block categories to reflect the **priority** you think they should take in system development; where number 1 is the **most important priority** for REGIONAL Facility-based development

|                                                                                   |                      |                              |
|-----------------------------------------------------------------------------------|----------------------|------------------------------|
|  | <input type="text"/> | Human Resources and Training |
|  | <input type="text"/> | Infrastructure and Equipment |
|  | <input type="text"/> | Data                         |
|  | <input type="text"/> | Processes                    |
|  | <input type="text"/> | Leadership and Governance    |

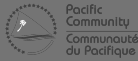

**Suva Regional Office**  
 Private Mail Bag  
 Suva, Fiji  
 Email: spc@pacint.net  
 Phone: +679 337 0733  
 Fax: +679 337 0021

**SPC Headquarters**  
 25 Princesville Road, Larnage  
 BP 05, 98048 Noumea Cedex  
 New Caledonia  
 Email: spc@pacint.net  
 Phone: +687 26 20 00  
 Fax: +687 26 38 19

## Pacific Regional Emergency Care: Facility (Hospital-based care)

### SECTION C: Regional Standards for Emergency Care Development

The following questions relate to potential MINIMUM standards in Facility (Hospital) - based emergency care (EC) that could be applied to the WHOLE PACIFIC REGION.

The standards relate to the categories and building blocks of system development. They can provide a target that each country could work towards.

In your responses below, please indicate the building blocks to which a MINIMUM PACIFIC REGIONAL STANDARD should apply:

(You can select all options that you think are appropriate)

#### 21. HUMAN RESOURCES AND TRAINING

Select the building blocks where you feel a MINIMUM PACIFIC REGIONAL STANDARD should apply to human resources and training

- |                                                                                                                                                                                                           |                                                                                                                                                                                                                               |
|-----------------------------------------------------------------------------------------------------------------------------------------------------------------------------------------------------------|-------------------------------------------------------------------------------------------------------------------------------------------------------------------------------------------------------------------------------|
| <input type="checkbox"/> All providers who work in emergency departments (EDs) should undertake basic training with certification and credentialing in recognition of their training level                | <input type="checkbox"/> All EDs at the National Referral and Provincial / Divisional Hospital level should have sufficient provider (medical and nursing) numbers to ensure 24 hour service and safe rostered working hours. |
| <input type="checkbox"/> Emergency Care (medicine and nursing) should be a recognised specialty with appropriate employment structures and career pathways                                                | <input type="checkbox"/> All EDs at the National Referral and Provincial / Divisional Hospital level should have staff employed and trained for clerical work, data entry, cleaning and security                              |
| <input type="checkbox"/> Training for EC (medical and nursing) should be consistent around the Pacific region with standardised certification and recognition between all Pacific Island Countries (PICs) |                                                                                                                                                                                                                               |

Other (please specify)

**22. At different facility levels, the MINIMUM PACIFIC REGIONAL STANDARD of training should be**

- |                                                                                                                                                                       |                                                                                                                                                                                                |
|-----------------------------------------------------------------------------------------------------------------------------------------------------------------------|------------------------------------------------------------------------------------------------------------------------------------------------------------------------------------------------|
| <input type="checkbox"/> All senior doctors at the National Referral Hospital level should have post-graduate specialty training (Diploma to Masters in EM)           | <input type="checkbox"/> At least one doctor and nurse at the Provincial / District / Divisional Hospital level should have post-graduate specialty training (Certificate – Diploma – Masters) |
| <input type="checkbox"/> All senior nurses at the National Referral Hospital level should have post-graduate specialty training (Certificate to Diploma)              | <input type="checkbox"/> All providers at the Provincial / District / Divisional Hospital level should have core short course skills in adult and paediatric emergency and trauma care         |
| <input type="checkbox"/> All providers at the National Referral Hospital level should have core short course skills in adult and paediatric emergency and trauma care |                                                                                                                                                                                                |
| <input type="checkbox"/> Other (please specify)                                                                                                                       |                                                                                                                                                                                                |

**23. Skills and knowledge from the following core short courses should form part of a MINIMUM STANDARD for facility-level providers in Pacific Island Countries (PICs).**

**At the National Referral Hospital Level:**

- |                                                                                                         |                                                                                                                   |
|---------------------------------------------------------------------------------------------------------|-------------------------------------------------------------------------------------------------------------------|
| <input type="checkbox"/> Basic Life Support (BLS)                                                       | <input type="checkbox"/> Major Incident Medical Management and Support (MIMMS)                                    |
| <input type="checkbox"/> Primary Trauma Care (PTC)                                                      | <input type="checkbox"/> Advanced Paediatric Life Support (APLS) or Advanced Paediatric Emergency Medicine (APEM) |
| <input type="checkbox"/> Emergency Life Support (ELS) or Serious Illness in Remote Environments (SIREN) | <input type="checkbox"/> Early Management of Severe Trauma (EMST) or Advanced Trauma Life Support (ATLS)          |
| <input type="checkbox"/> Advanced Cardiac Life Support (ACLS)                                           |                                                                                                                   |

Other (please specify)

**24. Skills and knowledge from the following core short courses should form part of a MINIMUM STANDARD for facility-level providers in Pacific Island Countries (PICs).**

**At the Provincial / District / Divisional Hospital Level:**

- |                                                                                                         |                                                                                                                   |
|---------------------------------------------------------------------------------------------------------|-------------------------------------------------------------------------------------------------------------------|
| <input type="checkbox"/> Basic Life Support (BLS)                                                       | <input type="checkbox"/> Major Incident Medical Management and Support (MIMMS)                                    |
| <input type="checkbox"/> Primary Trauma Care (PTC)                                                      | <input type="checkbox"/> Advanced Paediatric Life Support (APLS) or Advanced Paediatric Emergency Medicine (APEM) |
| <input type="checkbox"/> Emergency Life Support (ELS) or Serious Illness in Remote Environments (SIREN) | <input type="checkbox"/> Early Management of Severe Trauma (EMST) or Advanced Trauma Life Support (ATLS)          |
| <input type="checkbox"/> Advanced Cardiac Life Support (ACLS)                                           |                                                                                                                   |

Other (please specify)

## 25. INFRASTRUCTURE and EQUIPMENT

Select the building blocks where you feel a MINIMUM PACIFIC REGIONAL STANDARD should apply to infrastructure and equipment

- |                                                                                                                                                                                                                                                                       |                                                                                                                                                                                                                                    |
|-----------------------------------------------------------------------------------------------------------------------------------------------------------------------------------------------------------------------------------------------------------------------|------------------------------------------------------------------------------------------------------------------------------------------------------------------------------------------------------------------------------------|
| <input type="checkbox"/> There should be Pacific regional ED Design guidelines that describe core and optional standards for the layout, spatial and functional requirements of National Referral Hospital EDs that can apply to every PIC                            | <input type="checkbox"/> There should be a Pacific regional EC drug list which outlines the basic standard requirements for EC drugs that should be available in EC Facilities across different levels that can apply to every PIC |
| <input type="checkbox"/> At the National Referral Hospital and Provincial / Divisional Hospital level, there should be standardised requirements for a resuscitation room / area that includes design and core ABC equipment standards that can apply to every PIC    | <input type="checkbox"/> There should be a standard Pacific regional requirement for purpose-built EDs, with basic design guidelines for all PIC hospitals at the Provincial / District / Subdivisional level                      |
| <input type="checkbox"/> There should be Pacific regional EC equipment standards describing what is the core required equipment for resuscitation, assessment, treatment, monitoring and observation in the ED across all Facility levels that can apply to every PIC |                                                                                                                                                                                                                                    |

Other (please specify)

## 26. DATA

Select the building blocks where you feel a MINIMUM PACIFIC REGIONAL STANDARD should apply to data collection

- |                                                                                                                                                                                                                                                                    |                                                                                                                                                                                                                      |
|--------------------------------------------------------------------------------------------------------------------------------------------------------------------------------------------------------------------------------------------------------------------|----------------------------------------------------------------------------------------------------------------------------------------------------------------------------------------------------------------------|
| <input type="checkbox"/> There should be a Pacific regional standard list of 'Presenting / Chief Complaint' categories that can be used to collect standardised information on all patients presenting to EDs across all PICs                                      | <input type="checkbox"/> There should be a Pacific regional standard list of 'ED discharge diagnosis' categories that can be used to collect standardised information on all patients who attend EDs across all PICs |
| <input type="checkbox"/> All patients presenting for care at EDs across all facility levels should be registered and their basic demographic and 'Presenting Complaint' recorded                                                                                   | <input type="checkbox"/> There should be Pacific regional standardised ED quality and safety metrics that can be easily measured at the National Referral Hospital level across all PICs                             |
| <input type="checkbox"/> There should be a computer-based ED data management system and trained staff for data entry, that can record patient arrival, disposition and ED diagnosis information for all patients attending at the National Referral Hospital level |                                                                                                                                                                                                                      |

Other (please specify)



**27. PROCESSES**

Select the building blocks where you feel a MINIMUM PACIFIC REGIONAL STANDARD should apply to Facility-based processes

- |                                                                                                                                                                                      |                                                                                                                                                                                                                                                                        |
|--------------------------------------------------------------------------------------------------------------------------------------------------------------------------------------|------------------------------------------------------------------------------------------------------------------------------------------------------------------------------------------------------------------------------------------------------------------------|
| <input type="checkbox"/> All EDs across all facility levels in the Pacific region should use a recognised triage system to determine urgency of medical assessment                   | <input type="checkbox"/> Pacific regional standards should be developed for quality and safety in the ED (including maximum length of time waiting for a ward transfer, time to treatment for certain urgent conditions) and regular audit of performance should occur |
| <input type="checkbox"/> A standardised triage system should be developed or adopted for the whole Pacific region and used in all EDs across all facility levels in every PIC        | <input type="checkbox"/> All EDs should use internationally recognised guidelines for patient resuscitation and treatment of common life-threatening EC conditions                                                                                                     |
| <input type="checkbox"/> Clinical guidelines for the assessment and treatment of common ED presentations in PICs should be developed and used consistently across the Pacific region |                                                                                                                                                                                                                                                                        |

Other (please specify)

**28. LEADERSHIP AND GOVERNANCE**

Select the building blocks where you feel a MINIMUM PACIFIC REGIONAL STANDARD should apply to leadership and governance for Facility-based emergency care

- |                                                                                                                                                                                                                         |                                                                                                                                                                                                                          |
|-------------------------------------------------------------------------------------------------------------------------------------------------------------------------------------------------------------------------|--------------------------------------------------------------------------------------------------------------------------------------------------------------------------------------------------------------------------|
| <input type="checkbox"/> Emergency Care should be included as an essential component of the health care system and recognised as a speciality discipline in all PICs                                                    | <input type="checkbox"/> There should be laws protecting both patients and providers (that cover privacy, medico-legal, malpractice, and mandatory reporting) in EC facilities across all levels                         |
| <input type="checkbox"/> There should be a Pacific regional EC body that can provide advocacy and expert advice to individual PICs and regional organisations for the development of EC across the whole Pacific region | <input type="checkbox"/> There should be standardised operating procedures governing the relationship between EC facilities and other relevant agencies during disasters and surge events that can apply across all PICs |
| <input type="checkbox"/> All PICs should have employment structures, career pathways and supportive training opportunities for providers working in EDs                                                                 |                                                                                                                                                                                                                          |

Other (please specify)

29. Are there any other areas in Facility-based emergency care that you feel would benefit from minimum Pacific regional standards that are not on this list? (please describe)

30. Do you have any other comments about Pacific regional Facility (Hospital) - based emergency care priorities or standards?

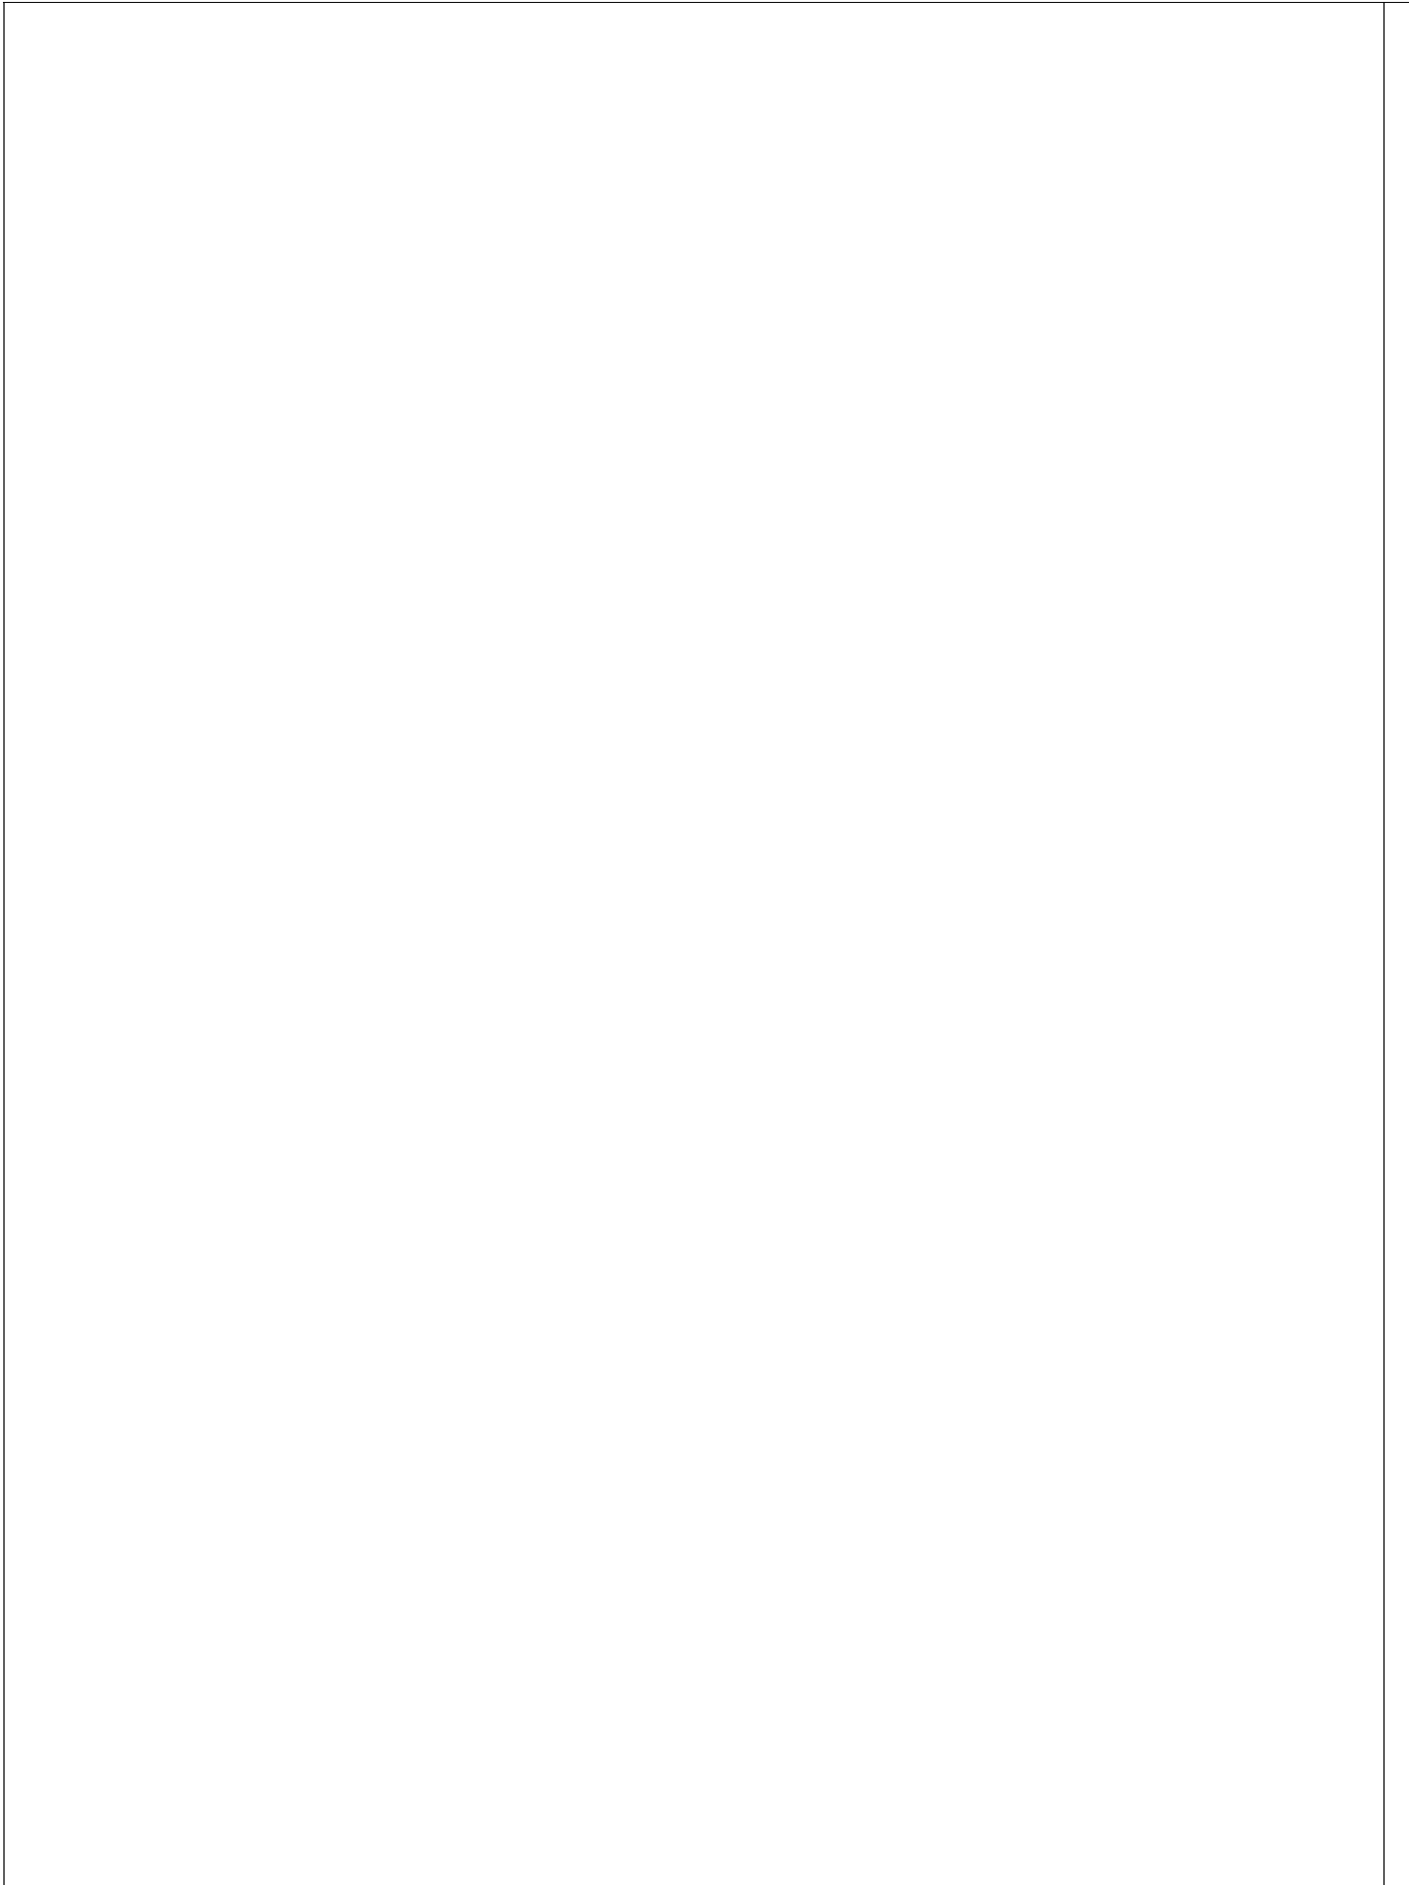



Suva Regional Office  
Private Mail Bag  
Suva, Fiji  
Email: [spc@spc.int](mailto:spc@spc.int)  
Phone: +679 337 0733  
Fax: +679 337 0021

SPC Headquarters  
25 Princesville Road, Larnaque  
BP 05, 98848 Noumea Cedex  
New Caledonia  
Email: [spc@spc.int](mailto:spc@spc.int)  
Phone: +687 26 20 00  
Fax: +687 26 38 19

## Pacific Regional Emergency Care: Facility (Hospital-based care)

### Optional contact information

**If you would like to receive feedback about this survey and participate in further consensus work on Facility-based Pacific regional priorities and standards, please add your name and email address below**

31. To receive feedback and participate further, please provide your name and email address

Name

Email address

32. To be acknowledged by name in the final report and research publication, please provide your name, role and country where you work

Name

Role / Position

Country

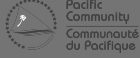

**Suva Regional Office**  
Private Mail Bag  
Suva, Fiji  
Email: [spc@spc.int](mailto:spc@spc.int)  
Phone: +679 337 0733  
Fax: +679 337 0021

**SPC Headquarters**  
25 Promenade Roger Larouque  
BP 05 98848 Noumea Cedex  
New Caledonia  
Email: [spc@spc.int](mailto:spc@spc.int)  
Phone: +687 26 20 00  
Fax: +687 26 38 19

## Pacific Regional Emergency Care: Facility (Hospital-based care)



**Suva Regional Office**  
Private Mail Bag  
Suva, Fiji  
Email: [spc@spc.int](mailto:spc@spc.int)  
Phone: +679 337 0333  
Fax: +679 337 0021

**SPC Headquarters**  
25 Promenade Roger Laroque  
BP 05, 98848 Noumea Cedex  
New Caledonia  
Email: [spc@spc.int](mailto:spc@spc.int)  
Phone: +687 26 20 00  
Fax: +687 26 38 19

## Pacific Regional Emergency Care: Pre-Hospital

### Welcome to the Pacific Regional Emergency Care - Pre-Hospital Survey

**You are invited to participate in this on-line survey about emergency care (EC) in the Pacific region.**

**Your participation is voluntary. We will not be collecting any of your personal information or any information that can identify you. Completing the survey will take around 15 minutes of your time.**

**The aim of this survey is to hear your opinions on the current status of EC in the country where you work, and then what you think are the most important priorities and standards for Pacific regional EC development.**

**The Pacific Community (SPC) have requested this project and contracted Dr Georgina Phillips to perform the work of creating the survey and collecting all of the results from your responses.**

**The results of the survey will be summarised and then presented to all of the Pacific Island Country representatives attending the Regional Development workshop on Wednesday 5th December 2018 at the DevelopingEM conference in Fiji. After this meeting and receiving everyone's feedback, we aim to reach a consensus on the priorities and standards for EC development across the Pacific region.**

**The final outcomes of this work will be;**

- **A comprehensive report for SPC that can be used to advocate for and guide future Pacific regional EC developments, and will also be delivered to Pacific Island Country Ministries of Health**
- **A research paper written by Dr Phillips in collaboration with SPC representatives and Pacific Island clinicians and published in a peer-review journal. This research paper will contribute towards the PhD studies of Dr Phillips at Monash University in Australia. Monash University have given ethics approval for this research.**

**If you would like to receive feedback about the survey results and participate in ongoing consensus work, you are free to provide your contact details at the end of the survey. You can also choose to be acknowledged by name in both of these output documents.**

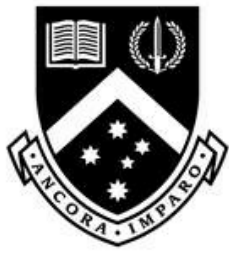

**MONASH**  
University

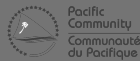

**Suva Regional Office**  
 Private Mail Bag  
 Suva, Fiji  
 Email: spc@spc.int  
 Phone: +679 337 0733  
 Fax: +679 337 0021

**SPC Headquarters**  
 25 Promenade Roger Laroque  
 BP 05, 98848 Noumea Cedex  
 New Caledonia  
 Email: spc@spc.int  
 Phone: +687 26 20 00  
 Fax: +687 26 38 19

## Pacific Regional Emergency Care: Pre-Hospital

### You and where you work

1. What country do you currently work in?



2. What type of facility or pre-hospital service do you work in?

- |                                                          |                                         |
|----------------------------------------------------------|-----------------------------------------|
| <input type="radio"/> National referral hospital         | <input type="radio"/> Health Centre     |
| <input type="radio"/> Provincial / Divisional hospital   | <input type="radio"/> Nursing station   |
| <input type="radio"/> District / Sub-divisional hospital | <input type="radio"/> Ambulance service |
| <input type="radio"/> Other (please specify)             |                                         |

3. What is your main role?

- |                                              |                                                                 |
|----------------------------------------------|-----------------------------------------------------------------|
| <input type="radio"/> Doctor                 | <input type="radio"/> Director of nursing                       |
| <input type="radio"/> Nurse                  | <input type="radio"/> Ministry of Health staff                  |
| <input type="radio"/> Hospital administrator | <input type="radio"/> Pre-Hospital care provider                |
| <input type="radio"/> Medical superintendent | <input type="radio"/> Pre-Hospital care driver or administrator |
| <input type="radio"/> Other (please specify) |                                                                 |



Suva Regional Office  
Private Mail Bag  
Suva, Fiji  
Email: spc@pacint  
Phone: +679 337 0733  
Fax: +679 337 0021

SPC Headquarters  
25 Princesville Road, Larnage  
P.O. Box 9848, Nuku'alofa  
New Caledonia  
Email: spc@pacint  
Phone: +687 26 20 00  
Fax: +687 26 26 19

## Pacific Regional Emergency Care: Pre-Hospital

### SECTION A: Current Situation Snapshot

For the following questions please indicate by selecting the option which best describes the current situation of **PRE-HOSPITAL** emergency care in the country where you work

4. There is a system to access emergency care from a **trained first responder** at the **scene** of an injury or illness and **urgent transport** to a health facility

- No system exists
- Some parts of the system exist but access to care is not reliable
- Most parts of the system exist but access to care is not reliable in all parts of the country
- Most parts of the system exist and access to care is reliable in most parts of the country but not of high quality
- Most parts of the system exist and access to care is reliable and of high quality in most parts of the country

5. There is a system to access emergency care and first aid from **trained first responders**

- No system exists
- Some groups are trained in first aid, but without any standard training or coordination
- There are some formally trained first responders but no system for the public to access them
- There are organised, trained first responder services that the public can access in some parts of the country
- There is access to trained first responder care and advice from the ambulance / central facility service in most parts of the country

6. There is a system that provides **emergency care during transport** between the scene and a facility (hospital or clinic), or between facilities

- No system exists
- A transport system exists but access to it is limited and unreliable
- A transport system with basic emergency care provision exists but access is limited and unreliable
- A transport system exists and access is reliable in most parts of the country but providers do not provide emergency care during transport
- A transport system exists and access to transport and emergency care during transport is reliable in most parts of the country



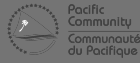

Suva Regional Office  
Private Mail Bag  
Suva, Fiji  
Email: spc@spc.int  
Phone: +679 337 0733  
Fax: +679 337 0021

SPC Headquarters  
25 Princesville Road, Larnage  
RF 05, 98448 Noumea Cedex  
New Caledonia  
Email: spc@spc.int  
Phone: +687 26 20 00  
Fax: +687 26 38 19

## Pacific Regional Emergency Care: Pre-Hospital

### SECTION B: Regional Priorities

The following questions relate to the “building blocks” that make up a prehospital emergency care (EC) system.

These building blocks are based on the WHO EC Systems Framework and are considered under 5 categories (human resources & training, equipment, data, processes, leadership & governance.)

|                                      | Human Resources & Training                                                                      | Equipment                                           | Data                                                               | Processes                                                                            | Leadership & Governance                                                      |
|--------------------------------------|-------------------------------------------------------------------------------------------------|-----------------------------------------------------|--------------------------------------------------------------------|--------------------------------------------------------------------------------------|------------------------------------------------------------------------------|
| System Activation                    | Training of call takers/dispatchers                                                             | Standardised ambulance<br>Equipment & provider kits | Recorded call taker time to answer call & ambulance dispatch times | Phone number to access pre-hospital care                                             | Clinical lead and ministry counterpart to lead pre-hospital care development |
| Scene Care and Provider Response     | Training of lay responders                                                                      | Personal Protective equipment & infection control   | Patient care records with standard clinical dataset                | Communications between dispatch, pre-hospital provider & facility                    | Laws to protect bystanders that provide care (“good Samaritan laws”)         |
|                                      | Training & certification of pre-hospital providers with career pathway                          |                                                     | Vehicle tracking                                                   | Clinical practice guidelines                                                         |                                                                              |
| Patient Transport and Transport Care | Separate certified driver to certified care provider (provides emergency care during transport) | Ambulance maintenance standards                     |                                                                    |                                                                                      | Laws to regulate ambulances, driving speeds & to protect & indemnify staff   |
| Overall system function              | Trained staff (separate from facility staff) for inter-facility transfers                       | Enough ambulances for urban & rural areas           |                                                                    | Standard operating procedures for roles & responsibilities at the scene in disasters | Medical oversight & medical director                                         |

Considering the **PACIFIC REGION** as a whole:

For each building block, please rate the **URGENCY** of regional development; whether it should be an immediate priority, achieved in 5 years, or is a long-term goal

7. Under the category of **Human Resources and Training**, please rate the urgency of each building block

|                                                                                                 | Immediate priority    | Should achieve in 5 years | Long term goal        |
|-------------------------------------------------------------------------------------------------|-----------------------|---------------------------|-----------------------|
| Training of call takers/dispatchers                                                             | <input type="radio"/> | <input type="radio"/>     | <input type="radio"/> |
| Training of lay responders                                                                      | <input type="radio"/> | <input type="radio"/>     | <input type="radio"/> |
| Training & certification of pre-hospital providers with career pathway                          | <input type="radio"/> | <input type="radio"/>     | <input type="radio"/> |
| Separate certified driver to certified care provider (provides emergency care during transport) | <input type="radio"/> | <input type="radio"/>     | <input type="radio"/> |
| Trained staff (separate from facility staff) for inter-facility transfers                       | <input type="radio"/> | <input type="radio"/>     | <input type="radio"/> |

8. Under the category of **Equipment**, please rate the urgency of each building block:

|                                                       | Immediate priority    | Should achieve in 5 years | Long term goal        |
|-------------------------------------------------------|-----------------------|---------------------------|-----------------------|
| Standardised ambulance with equipment & provider kits | <input type="radio"/> | <input type="radio"/>     | <input type="radio"/> |
| Personal Protective equipment & infection control     | <input type="radio"/> | <input type="radio"/>     | <input type="radio"/> |
| Ambulance maintenance standards                       | <input type="radio"/> | <input type="radio"/>     | <input type="radio"/> |
| Enough ambulances for urban & rural areas             | <input type="radio"/> | <input type="radio"/>     | <input type="radio"/> |

9. Under the category of **Data**, please rate the urgency of each building block:

|                                                                    | Immediate priority    | Should achieve in 5 years | Long term goal        |
|--------------------------------------------------------------------|-----------------------|---------------------------|-----------------------|
| Recorded call taker time to answer call & ambulance dispatch times | <input type="radio"/> | <input type="radio"/>     | <input type="radio"/> |
| Patient care records with standard clinical dataset                | <input type="radio"/> | <input type="radio"/>     | <input type="radio"/> |
| Vehicle tracking                                                   | <input type="radio"/> | <input type="radio"/>     | <input type="radio"/> |

10. Under the category of **Processes**; please rate the urgency of each building block:

|                                                                                      | Immediate priority    | Should achieve in 5 years | Long term goal        |
|--------------------------------------------------------------------------------------|-----------------------|---------------------------|-----------------------|
| Phone number to access pre-hospital care                                             | <input type="radio"/> | <input type="radio"/>     | <input type="radio"/> |
| Communications between dispatch, pre-hospital provider & facility                    | <input type="radio"/> | <input type="radio"/>     | <input type="radio"/> |
| Clinical practice guidelines                                                         | <input type="radio"/> | <input type="radio"/>     | <input type="radio"/> |
| Standard operating procedures for roles & responsibilities at the scene in disasters | <input type="radio"/> | <input type="radio"/>     | <input type="radio"/> |

11. Under the category of **Leadership and Governance**, please rate the urgency of each building block:

|                                                                              | Immediate priority    | Should achieve in 5 years | Long term goal        |
|------------------------------------------------------------------------------|-----------------------|---------------------------|-----------------------|
| Clinical lead and ministry counterpart to lead pre-hospital care development | <input type="radio"/> | <input type="radio"/>     | <input type="radio"/> |
| Laws to protect bystanders that provide care ("good Samaritan laws")         | <input type="radio"/> | <input type="radio"/>     | <input type="radio"/> |
| Laws to regulate ambulances, driving speeds & to protect & indemnify staff   | <input type="radio"/> | <input type="radio"/>     | <input type="radio"/> |
| Medical oversight & medical director                                         | <input type="radio"/> | <input type="radio"/>     | <input type="radio"/> |

12. Are there any other important **regional Pre-Hospital (Scene and Transfer) priorities** that are not in this list?

13. Considering the **PACIFIC REGION** as a whole, please rate the 5 main building block categories to reflect the **priority** you think they should take in system development; where number 1 is the **most important priority** for REGIONAL Pre-Hospital development

|                                                                                   |                               |                              |
|-----------------------------------------------------------------------------------|-------------------------------|------------------------------|
|  | <input type="text" value=""/> | Human Resources and Training |
|  | <input type="text" value=""/> | Equipment                    |
|  | <input type="text" value=""/> | Data                         |
|  | <input type="text" value=""/> | Processes                    |
|  | <input type="text" value=""/> | Leadership and Governance    |



Suva Regional Office  
Private Mail Bag  
Suva, Fiji  
Email: spc@pacint  
Phone: +679 337 0733  
Fax: +679 337 0021

SPC Headquarters  
25 Princesville Road, Larnage  
PO Box 98848 Noumea Cedex  
New Caledonia  
Email: spc@pacint  
Phone: +687 26 20 00  
Fax: +687 26 38 19

## Pacific Regional Emergency Care: Pre-Hospital

### SECTION C: Regional Standards for Emergency Care Development

The following questions relate to potential MINIMUM standards in Pre-Hospital emergency care that could be applied to the WHOLE PACIFIC REGION.

The standards relate to the categories and building blocks of system development. They can provide a target that each country could work towards.

In your responses below, please indicate the building blocks to which a MINIMUM PACIFIC REGIONAL STANDARD should apply:

(you can select all options that you think are appropriate)

#### 14. HUMAN RESOURCES AND TRAINING

Select the building blocks where you feel a MINIMUM PACIFIC REGIONAL STANDARD should apply to human resources and training

- |                                                                                                                                               |                                                                                                                                                    |
|-----------------------------------------------------------------------------------------------------------------------------------------------|----------------------------------------------------------------------------------------------------------------------------------------------------|
| <input type="checkbox"/> All pre-hospital care providers should undertake a basic training course with certification                          | <input type="checkbox"/> There should be standardised retrieval training for emergency care practitioners based in remote locations                |
| <input type="checkbox"/> A career pathway should exist for pre-hospital drivers and providers, which is separate to that of ED facility staff | <input type="checkbox"/> There should be basic training in emergency care for emergency services personnel (fire, police) and community volunteers |
| <input type="checkbox"/> The staffing model should consist of a separate driver and care provider                                             |                                                                                                                                                    |

Other (please specify)

15. Skills and knowledge from the following short courses should form part of a MINIMUM STANDARD for pre-hospital providers in Pacific Island Countries (PICs)

- |                                                                                                         |                                                                                |
|---------------------------------------------------------------------------------------------------------|--------------------------------------------------------------------------------|
| <input type="checkbox"/> Basic Life Support (BLS)                                                       | <input type="checkbox"/> Advanced Cardiac Life Support (ACLS)                  |
| <input type="checkbox"/> Primary Trauma Care (PTC)                                                      | <input type="checkbox"/> Major Incident Medical Management and Support (MIMMS) |
| <input type="checkbox"/> Emergency Life Support (ELS) or Serious Illness in Remote Environments (SIREN) |                                                                                |

Other (please specify)

## 16. EQUIPMENT

Select the building blocks where you feel a MINIMUM PACIFIC REGIONAL STANDARD should apply to equipment

- |                                                                                                                                                                              |                                                                                                                                    |
|------------------------------------------------------------------------------------------------------------------------------------------------------------------------------|------------------------------------------------------------------------------------------------------------------------------------|
| <input type="checkbox"/> Ambulances in all PICs should carry a standard set of equipment for emergency care (including oxygen, fluids, emergency drug kit and injury care)   | <input type="checkbox"/> Ambulances in all PICs should undergo regular maintenance checks and be certified as roadworthy           |
| <input type="checkbox"/> Ambulances in all PICs should be equipped with devices including radios to enable communication with the dispatch centre and health care facilities | <input type="checkbox"/> Ambulances in all PICs should carry a monitor (with BP, pulse and SpO2) and Automated defibrillator (AED) |
| <input type="checkbox"/> Ambulances in all PICs should be fitted with a stretcher or trolley that can be safely secured                                                      |                                                                                                                                    |

Other (please specify)

## 17. DATA

Select the building blocks where you feel a MINIMUM PACIFIC REGIONAL STANDARD should apply to data collection

- |                                                                                                                                                                        |                                                                                                                                                            |
|------------------------------------------------------------------------------------------------------------------------------------------------------------------------|------------------------------------------------------------------------------------------------------------------------------------------------------------|
| <input type="checkbox"/> All calls to ambulance services must be logged and the time from call to dispatch of ambulance must be recorded                               | <input type="checkbox"/> Vehicles should be tracked so that their location is always known                                                                 |
| <input type="checkbox"/> There should be a Pacific regional standard list of 'ambulance call' problems and the type of problem should be recorded for every call       | <input type="checkbox"/> Pre-hospital care providers should complete a patient care record for every case which contains standardised clinical information |
| <input type="checkbox"/> There should be standardised Pacific regional response time targets for the highest priority cases, according to urban or remote environments |                                                                                                                                                            |

Other (please specify)

**18. PROCESSES**

Select the building blocks where you feel a MINIMUM PACIFIC REGIONAL STANDARD should apply to Pre-Hospital processes

- |                                                                                                                                                                                               |                                                                                                                                                                                                                                                  |
|-----------------------------------------------------------------------------------------------------------------------------------------------------------------------------------------------|--------------------------------------------------------------------------------------------------------------------------------------------------------------------------------------------------------------------------------------------------|
| <input type="checkbox"/> All PICs should use a process to dispatch ambulances according to clinical priority                                                                                  | <input type="checkbox"/> All PICs should use a process whereby the facility is notified of a critically ill or injured patient prior to their arrival by ambulance                                                                               |
| <input type="checkbox"/> Clinical Practice Guidelines for the pre-hospital management of common emergencies in PICs should be developed and used consistently across the Pacific region       | <input type="checkbox"/> All PICs should have a processes to ensure that patients are transported to facilities that can provide for their needs (e.g. major trauma or burns) -either directly from the scene or through inter-facility transfer |
| <input type="checkbox"/> All PICs should have standard operating procedures that guide the actions of ambulance personnel and those from other emergency services at the scene of an accident |                                                                                                                                                                                                                                                  |

Other (please specify)

**19. LEADERSHIP AND GOVERNANCE**

Select the building blocks where you feel a MINIMUM PACIFIC REGIONAL STANDARD should apply to Pre-Hospital leadership and governance

- |                                                                                                                                                                              |                                                                                                                                      |
|------------------------------------------------------------------------------------------------------------------------------------------------------------------------------|--------------------------------------------------------------------------------------------------------------------------------------|
| <input type="checkbox"/> All PICs should have "Good Samaritan" laws that protect bystanders who provide emergency care                                                       | <input type="checkbox"/> There should be legislation governing pre-hospital care services and a nominated ministry lead in every PIC |
| <input type="checkbox"/> In all PICs, speed limits should apply to ambulances, and can only be broken when authorised - such as responding to the most urgent cases          | <input type="checkbox"/> All PICs should have a nominated pre-hospital care clinical lead who is officially recognised by government |
| <input type="checkbox"/> In all PICs, ambulances must be licenced, comply with maintenance and equipment standards and pre-hospital care staff must be certified to practice |                                                                                                                                      |

Other (please specify)

20. Are there any other areas in Pre-Hospital emergency care that you feel would benefit from Pacific regional minimum regional standards that are not on this list? (please describe)

21. Do you have any other comments about Pacific regional Pre-Hospital emergency care priorities or standards?



Suva Regional Office  
Private Mail Bag  
Suva, Fiji  
Email: [spc@spc.int](mailto:spc@spc.int)  
Phone: +679 337 0733  
Fax: +679 337 0021

SPC Headquarters  
25 Princesville Road, Larnaque  
PF 05, 98848 Noumea Cedex  
New Caledonia  
Email: [spc@spc.int](mailto:spc@spc.int)  
Phone: +687 26 20 00  
Fax: +687 26 38 19

## Pacific Regional Emergency Care: Pre-Hospital

### Optional contact information

**If you would like to receive feedback about this survey and participate in further consensus work on Pre-Hospital Pacific regional priorities and standards, please add your name and email address below**

22. To receive feedback and participate further, please provide your name and email address

Name

Email address

23. To be acknowledged by name in the final report and research publication, please provide your name, role and country where you work

Name

Role / Position

Country



# Pacific Emergency Care

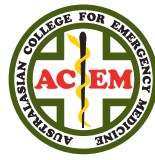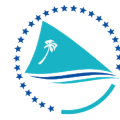

Pacific Community  
Communauté du Pacifique

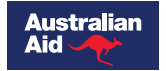

## Why?

Health emergencies occur everywhere in the Pacific. Currently there is limited capacity to respond

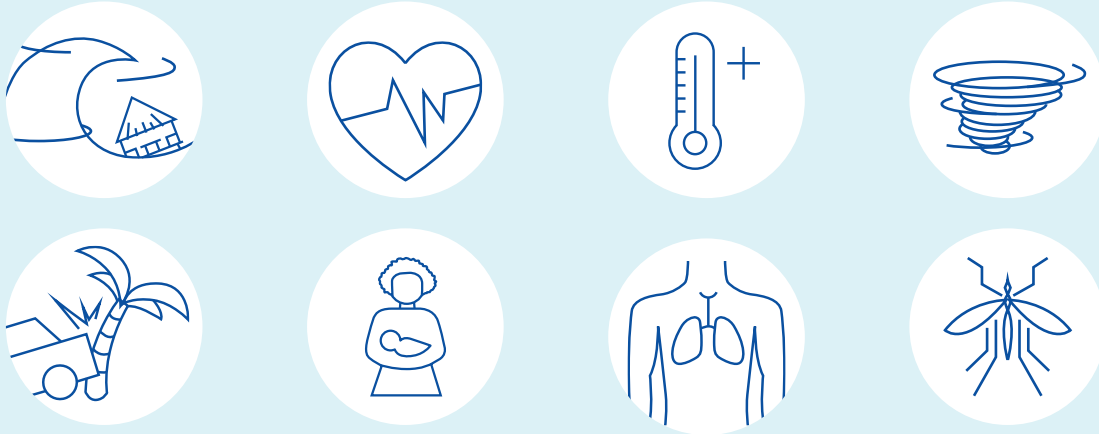

## What is it / What are the components?

Effective emergency care systems can respond to all health emergencies by:

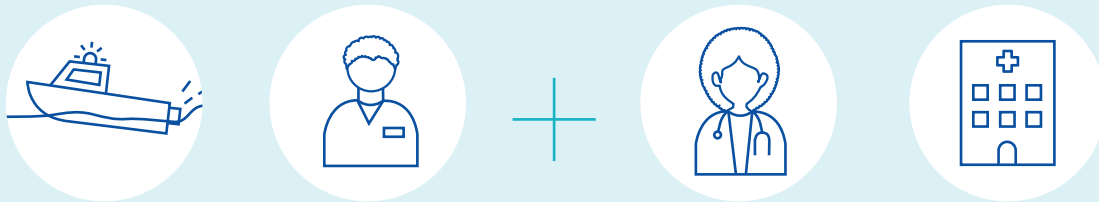

Pre-hospital care

Facility-based care

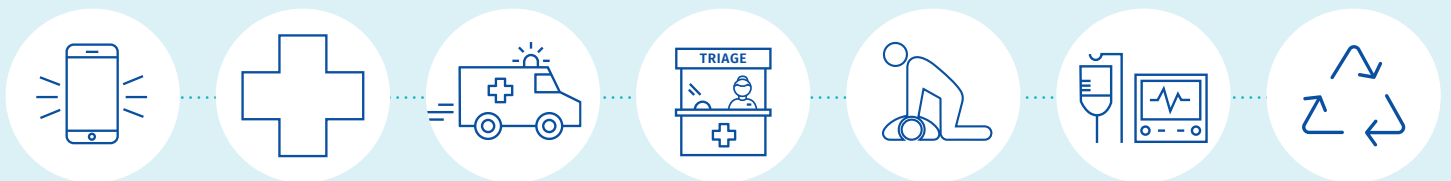

Call for help

Trained first responder

Safe transport and care

Facility reception and triage

Resuscitation and acute care by trained staff

Well designed environment and equipment

Effective processes – OT, Ward, D/C home

## What are the outcomes?

Safe and effective emergency care across the Pacific will;

save lives

54%

of deaths each year in Low and Middle Income Countries can be prevented by EC\*

prevent disability

~1 billion

disability-adjusted life years can be saved annually with robust EC systems in LMIC\*\*

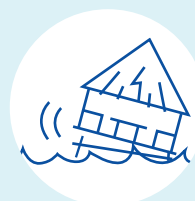

improve disaster and disease outbreak resilience and response

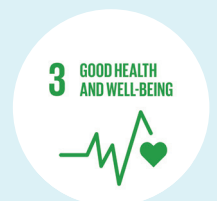

help meet the SDG targets

\*data from WHO 2013  
\*\*Disease Control Priorities 2015

# Facility-based Emergency Care: Pacific regional priorities and standards

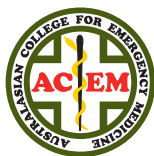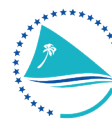

Pacific Community  
Communauté du Pacifique

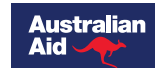

1 Trained and credentialed staff with core skills and knowledge

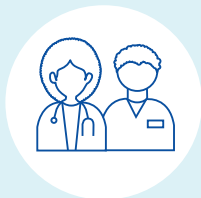

24hr rostering, safe working hours

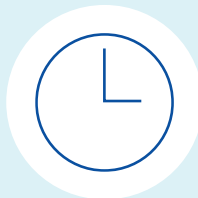

Only 38%

of PIC clinicians report having EC-trained staff in their hospitals

2 Well designed emergency departments according to Pacific regional standards

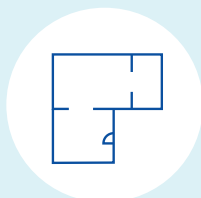

Designated area and standard equipment for resuscitation of adults and children

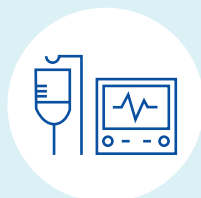

Only 44%

of PIC clinicians report a good area for safe resuscitation and emergency care in their hospitals\*

3 A recognised triage system

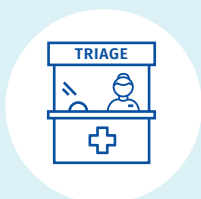

Clinical care guidelines adapted for the Pacific context

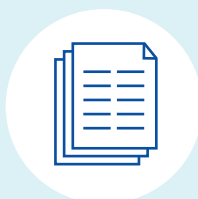

Only 18%

of PIC clinicians report reliable and consistent use of triage in their countries\*

4 Computer-based data collection, documenting the burden of emergency care disease

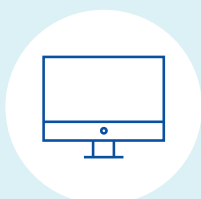

Measuring quality and safety of care to drive improvement

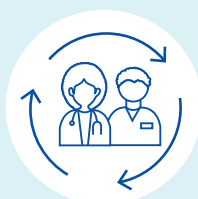

More than 90%

of PIC clinicians cannot access consistent information about the emergency care needs of their population\*

Government recognition of emergency care as an essential component of the healthcare system

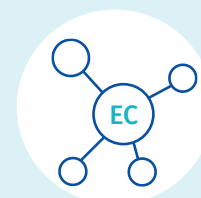

Government support through training opportunities, employment and career structures

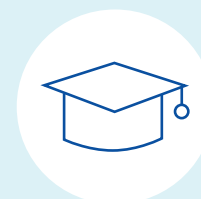

32%

of PIC clinicians report that their country has a plan for emergency care\*

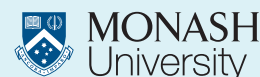

\*Pacific Regional Emergency Care: Facility-based Survey. Nov-Dec 2018, SPC and Monash University.

# Pre-Hospital Emergency Care: Pacific regional priorities and standards

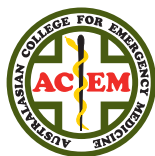

Pacific Community  
Communauté du Pacifique

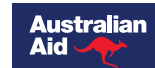

1 Pre-hospital care providers with basic training and certification.  
Separate driver and care provider

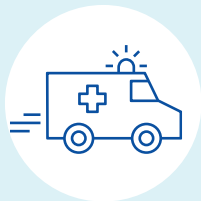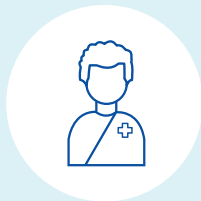

Only 36%

of PIC clinicians report trained pre-hospital care providers in their countries\*

2 Ambulances are well maintained and equipped with  
standardised care kits and radios

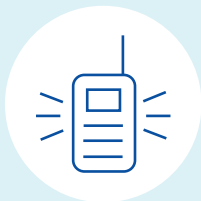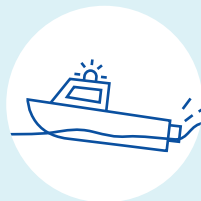

More than 80%

of PIC clinicians report unreliable access to care during transport to a hospital\*

3 Clinical practice guidelines developed for the Pacific context. Standard  
operating procedures for pre-hospital care in accidents and disasters

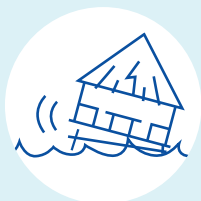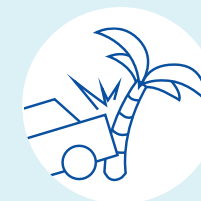

9.2 million affected, 10,000 deaths

due to extreme weather events in Pacific 1950-2011\*\*

4 Logged ambulance calls. Standard collection of information.  
Dispatch according to clinical priority

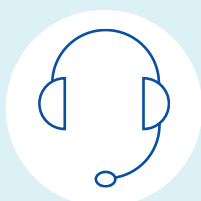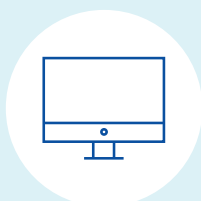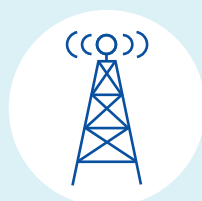

Only 9%

of PIC clinicians report a centrally dispatched ambulance system\*

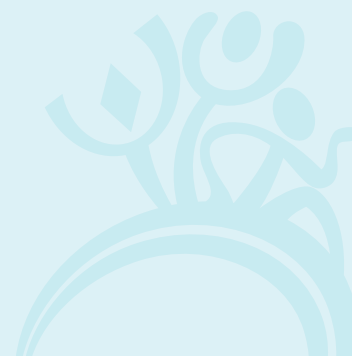

Both Clinical and Ministry  
of Health leadership in  
pre-hospital care

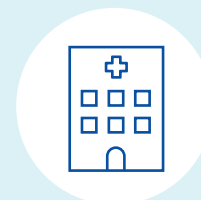

96%

of PIC clinicians do not have  
a high quality pre-hospital  
system in their country

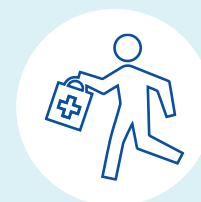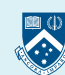

MONASH  
University

\*Pacific Regional Emergency Care:  
Pre-Hospital Survey. Nov-Dec  
2018, SPC and Monash University.

\*\*World Bank, 2017

**APPENDIX: List of participants (who consented and requested acknowledgement)**

| <b>Name</b>                     | <b>Position</b>                                  | <b>Country</b>         |
|---------------------------------|--------------------------------------------------|------------------------|
| Rose Kila                       | Deputy Director Nursing. Kerema General Hospital | Papua New Guinea (PNG) |
| Scotty Kandelyo                 | Emergency Physician and Coordinator WHPHA        | PNG                    |
| Dr Amit Sewak                   | Clinical services chair and emergency specialist | Fiji                   |
| Lamour Hansell                  | Anaesthesia Head of Unit                         | Samoa                  |
| Lucas Kondi                     | Medical Officer                                  | PNG                    |
| Toko Amasone-Moulongo           | Medical Officer                                  | Tuvalu Islands         |
| Rubaina Singh                   | Nurse                                            | Fiji                   |
| Ashwin Lal                      | Nurse                                            | Fiji                   |
| Dr.SidonioJoao da Silva Pereira | GP-ED doctor and team leader                     | Timor Leste            |
| Anare Ketedromo                 | General Practitioner                             | Marshall Islands (RMI) |
| Dr. Robert Maddison             | Chief of Medical Staffs, Majuro Hospital         | Majuro, RMI            |
| Vaimaila Salele                 | Doctor                                           | Samoa                  |
| Chandler Tuilagi                | Doctor                                           | Samoa                  |
| Dr Desmond Aisi                 | Emergency Physician                              | Papua New Guinea       |
| Scott                           | Intern                                           | Samoa                  |
| Dr Dina Tuitama                 | Icu HOU                                          | Samoa                  |
| Nelly Aika                      | Emergency Registrar                              | Papua New Guinea       |
| Sieni Metuli                    | Nurse Manager                                    | Samoa                  |
| Dr Alani Tangitau               | National Chief Clinical Adviser                  | Tokelau                |
| Charlie Numanga                 | Manager Ambulance Officer                        | Cook Islands           |
| Dr. Yin Yin May                 | Director Hospital Health services                | Cook Islands           |
| John Muaki                      | Director Nursing Education                       | Solomon Islands        |
| Gracelyn Potjepat               | Clinical nurse educator                          | Papua New Guinea       |
| armando espiritu ,jr            | M.D.                                             | Marshall Islands       |
| George Gupi                     | Paramedic OTML                                   | PNG                    |

|                                 |                                                            |                          |
|---------------------------------|------------------------------------------------------------|--------------------------|
| Corazon M. Rivera M.D.          | OBGYN                                                      | Marshall Islands         |
| Jorbi Balos                     | Assistant Medical officer                                  | Marshall Islands         |
| Felicito N. Noriega             | Staff Physician - Internist                                | Marshall Islands         |
| Nolan Fuamatu                   | Doctor                                                     | Samoa                    |
| Ngirachisau Mekoll              | Director, Belau National Hospital                          | Palau                    |
| antonnette o. merur             | Director of Nursing, Palau Ministry of Health              | Palau                    |
| Leba Tagilala                   | Registered Nurse (General Nursing)                         | Fiji                     |
| Elizabeth K Sanau               | Clinical Nurse                                             | Solomon Islands          |
| Bernadette Lama                 | Clinic Supervisor                                          | Papua New Guinea         |
| Dr Duncan Sengiromo             | Specialist Medical Officer                                 | Papua New Guinea         |
| mareta jacob                    | MO Incharge OPED Rarotonga Hospital                        | Cook Islands             |
| Shivani Shailin                 | Emergency Registrar                                        | Fiji                     |
| Ulysses Oli                     | Doctor                                                     | Papua New Guinea         |
| Kune Gabriel                    | Surgeon                                                    | PNG                      |
| Dr Gary Geregana Nou            | President PNGSEM                                           | Papua New Guinea         |
| John Junior McKup               | Emergency Physician                                        | Papua New Guinea         |
| Gustodio A De Jesus             | EM trainee                                                 | Timor Leste (East Timor) |
| Gane Rowley Simbe               | Doctor                                                     | Solomon Islands          |
| Carl J Kingston                 | Emergency Physician                                        | Papua New Guinea         |
| Dr Krishneel Krishna            | Head of Department, Emergency Department, Lautoka Hospital | Fiji                     |
| Jacinta Ramo                    | Doctor                                                     | Solomon island           |
| Maoto Asaelu                    | Medical officer                                            | Tuvalu                   |
| Aloima Taufilo Teatu            | Emergency Medicine Registrar                               | Tuvalu                   |
| Deepak Sharma                   | ED Registrar                                               | Fiji                     |
| Ulises Tapuvae                  | Principal Nursing Officer                                  | Samoa                    |
| Adriel Rageci                   | Emergency department doctor                                | Fiji                     |
| John Richardson Selwyn Houniuhi | Director of Nursing Services                               | Solomon Islands          |
| Dr Trina Sale                   | Head of Emergency Medicine                                 | Solomon Islands          |

|                            |                                                      |                                |
|----------------------------|------------------------------------------------------|--------------------------------|
| Kanchan                    | Registered Nurse                                     | Fiji Islands                   |
| Rajnish chand              | Staff nurse ed                                       | Fiji                           |
| Arnold Shiva Sami          | Medical Officer/ Doctor                              | Fiji                           |
| Helen Murdoch              | Director of Nursing Services                         | Kiribati                       |
| Tanebu Tong                | medical officer/ emergency department                | Kiribati                       |
| Payne Perman               | Internist                                            | Federated States of Micronesia |
| Mangu Kendino              | Emergency Physician                                  | Papua New Guinea               |
| Peter Hasugulmal           | General Surgeon                                      | Marshall Islands               |
| Jeffrey Samana             | Act Nursing services manager (Vila Central Hospital) | Vanuatu                        |
| Tom Jack                   | Medical Director of Public Health                    | RMI                            |
| Vasiti Tagicakibau         | Nursing Unit Manager                                 | Fiji                           |
| Paz V. Estoesta            | Staff Physician/Pediatrician                         | Marshall Islands               |
| Dr Samuel Andrew           | Emergency Physician - Popondetta Hospital            | Papua New Guinea               |
| aristotle cruz             | ER physician /Family practitioner                    | Marshall Islands               |
| Jason Tautasi              | Medical Officer                                      | Niue                           |
| Lavinesh Raj               | EM Physician                                         | Fiji                           |
| Basil Leodoro              | General Surgeon / Senior Consultant                  | Vanuatu                        |
| Betty Maesua Ramolelea     | Emergency Nurse Unit Manager, NRH,                   | Solomon Islands                |
| Matamoana Tupou            | SMO, Vaiola Hospital ED                              | Tonga                          |
| Jemesa Tudravu             | Medical Superintendent CWM Hospital                  | Suva, FIJI                     |
| ATUA VINCENT               | EM Specialist and Director Medical Services          | Papua New Guinea               |
| Alben Yamba                | Medical Officer                                      | PNG                            |
| Sebastian Paulo            | Emergency Registrar                                  | Samoa                          |
| Mere Woonton               | Nurse Practitioner                                   | Cook Islands (Penrhyn)         |
| George Gupi                | Paramedic Oktedi Mining Ltd                          | PNG                            |
| Lisiate K 'Ulufonua        | Medical Superintendent                               | Tonga                          |
| Keneuati aka Kencie Lemani | Registered Nurse                                     | Samoa                          |

|                      |                                  |                 |
|----------------------|----------------------------------|-----------------|
| Alex Bradley Munamua | Orthopaedic registrar            | Solomon Islands |
| Anevili M- Ale       | Registered Nurse                 | Samoa           |
| Bernadette Fanueli   | Nurse                            | Samoa           |
| Falahola Fuka        | Senior Medical Officer           | Tonga           |
| Helena T Papalii     | Registered Nurse                 | Samoa           |
| May Laga'aia         | Care Provider / Registered Nurse | Samoa           |
| Anthony Blake        | Paramedic/ Retrieval Support     | Fiji            |
| Shanil sukul         | Registered Nurse                 | Fiji            |
| Trelly Patunvanu     | ED Registrar                     | Vanuatu         |
